# Supplementary material for: Search for mid- and high-entropy transition-metal chalcogenides – investigating the pentlandite structure
Source: Royal Society of Chemistry journal article supplement (doi:10.1039/d1dt00794g), 2021-01-01
Supplement: d1dt00794g1.pdf [file d1dt00794g1.pdf]

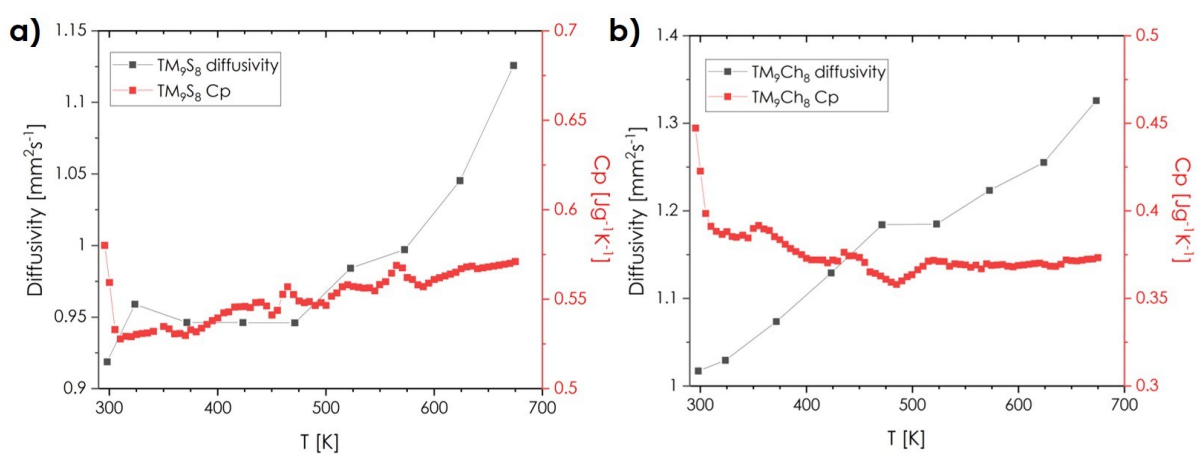

**SI.Fig. 1.** Thermal diffusivity and specific heat ( $\text{Cp}$ ) measurements for  $\text{TM}_9\text{S}_8$  (a) and  $\text{TM}_9\text{Ch}_8$  IHP-sintered pellets.

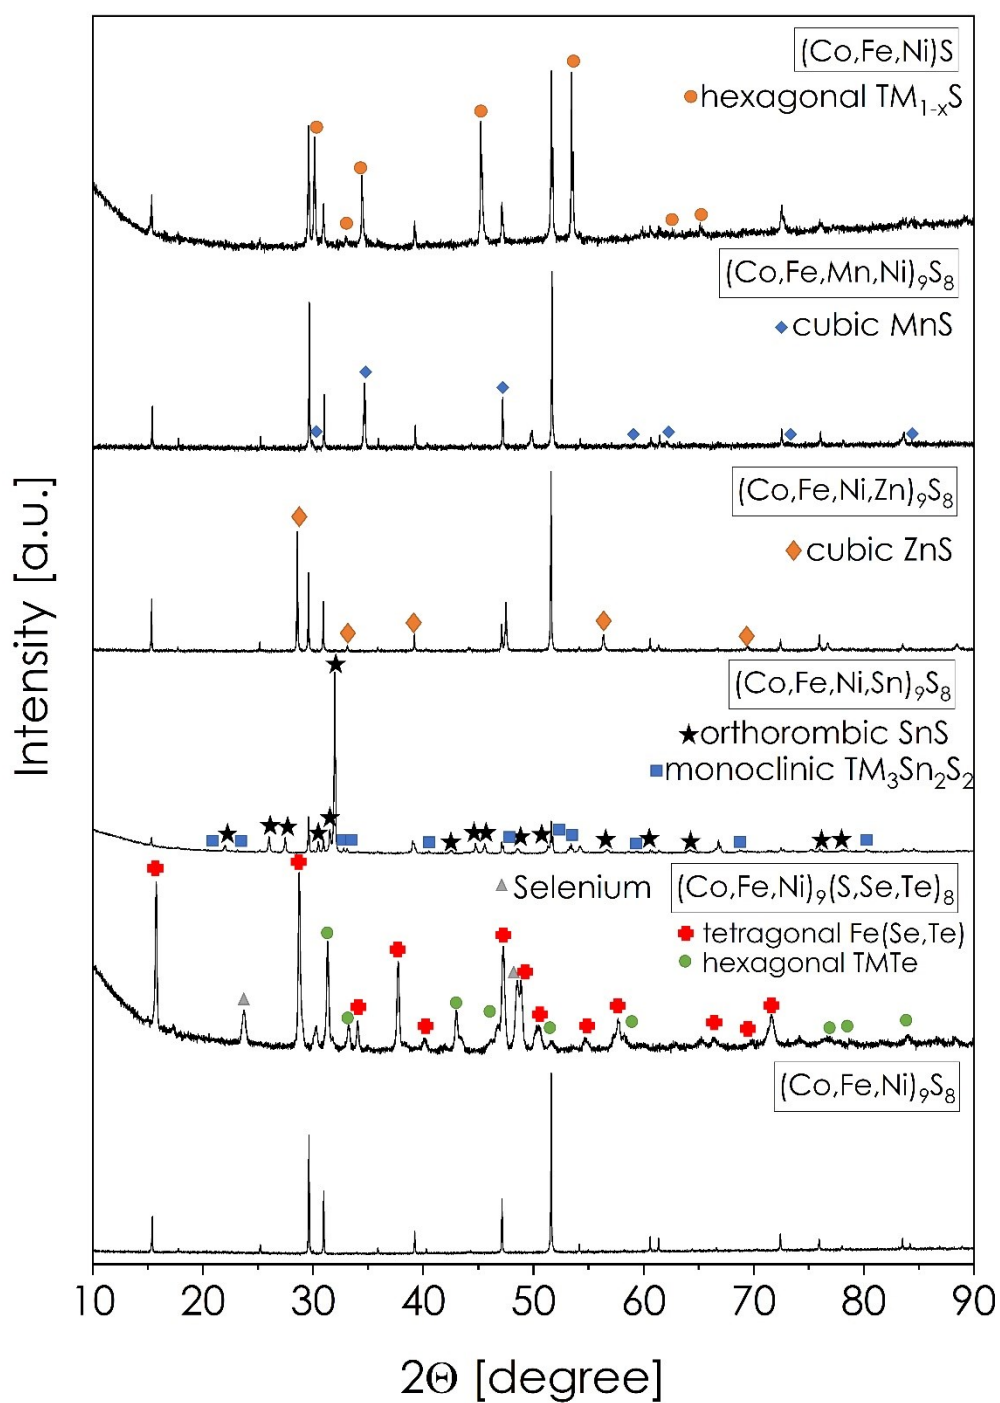

**SI.Fig. 2.** XRD diffraction patterns of the multi-phase  $(\text{Co,Fe,Ni})\text{S}$ ,  $(\text{Co,Fe,Mn,Ni})_9\text{S}_8$ ,  $(\text{Co,Fe,Ni,Sn})_9\text{S}_8$ ,  $(\text{Co,Fe,Ni,Zn})_9\text{S}_8$ ,  $(\text{Co,Fe,Ni})_9(\text{S,Se,Te})_8$ , and single-phase  $(\text{Co,Fe,Ni})_9\text{S}_8$  pentlandite powder samples.

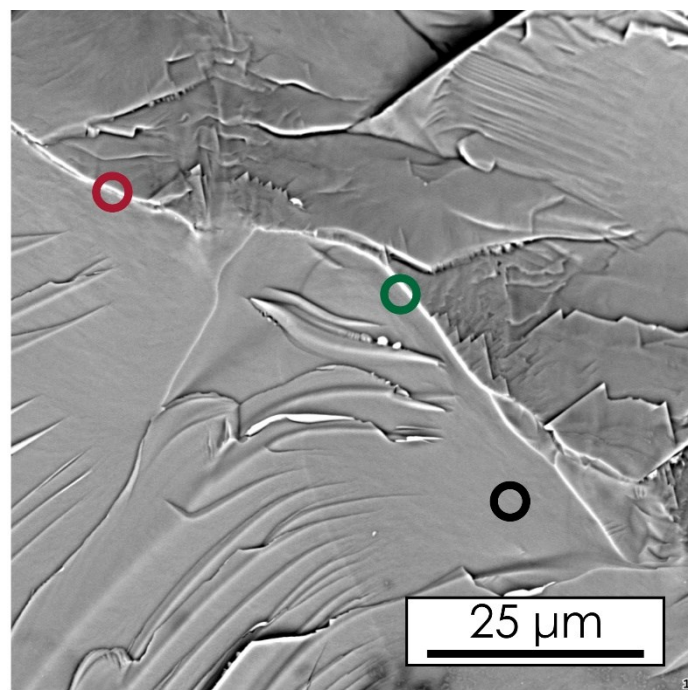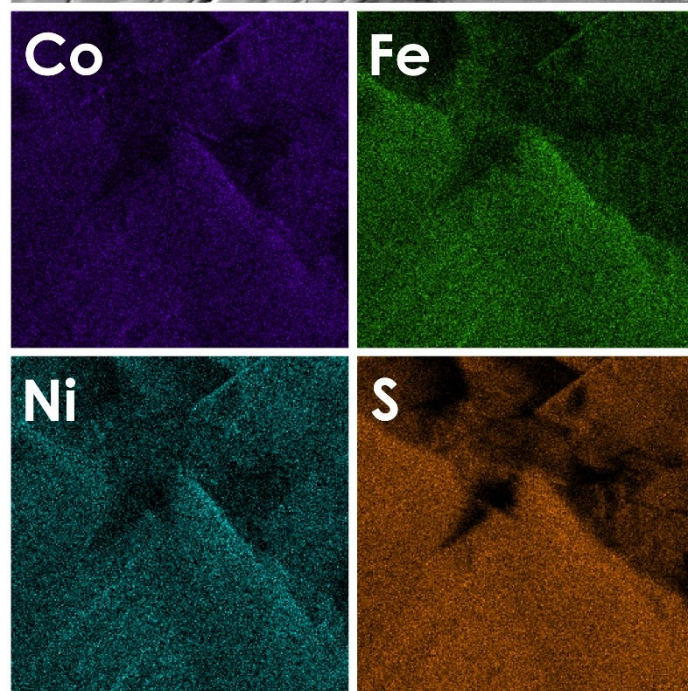

|     | Co   | Fe   | Ni   | S    |
|-----|------|------|------|------|
| avg | 22.6 | 19,4 | 17.3 | 40.8 |
| ○   | 14.3 | 22.2 | 15.8 | 47.7 |
| ○   | 14.0 | 22.2 | 12.8 | 51.1 |
| ○   | 17.9 | 19.9 | 14.6 | 47.6 |

**SI.Fig. 3.** SEM micrographs together with the corresponding EDS mappings and point/area analysis. All data was collected from the fractured, as-synthesized (Co,Fe,Ni)S ingot.



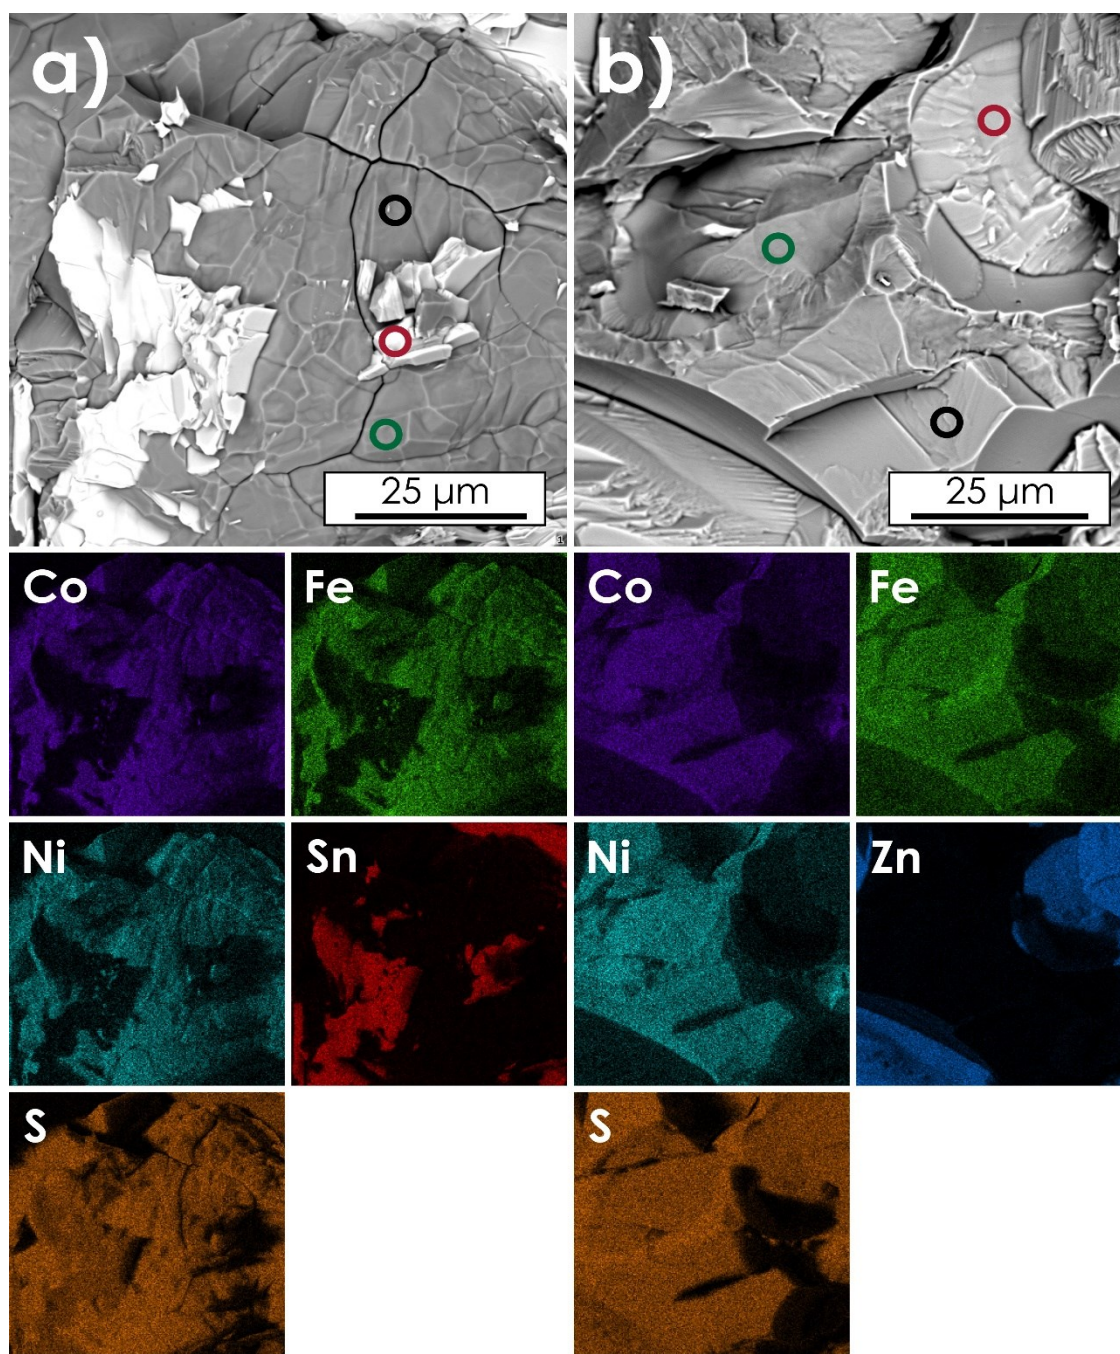

|     | Co   | Fe   | Ni   | Sn   | S    |     | Co   | Fe   | Ni   | Zn   | S    |
|-----|------|------|------|------|------|-----|------|------|------|------|------|
| avg | 21.3 | 13.4 | 16.2 | 11.4 | 37.8 | avg | 14.5 | 13.8 | 16.0 | 12.7 | 43.0 |
| ⊙   | 2.6  | 1.6  | 1.8  | 54.1 | 39.9 | ⊙   | 6.3  | 7.6  | 1.3  | 36.1 | 48.7 |
| ⊙   | 23.1 | 14.1 | 18.3 | 0.1  | 44.4 | ⊙   | 17.9 | 12.3 | 23.4 | 0.0  | 46.4 |
| ⊙   | 24.6 | 14.3 | 19.3 | 0.9  | 41.0 | ⊙   | 19.2 | 11.0 | 22.9 | 0.0  | 46.9 |

SI.Fig

4. SEM micrographs together with the corresponding EDS mappings and point/area analysis.

All data was collected from the fractured, as-synthesized  $(\text{Co,Fe,Ni,Sn})_9\text{S}_8$  (a), and

$(\text{Co,Fe,Ni,Zn})_9\text{S}_8$  ingots.



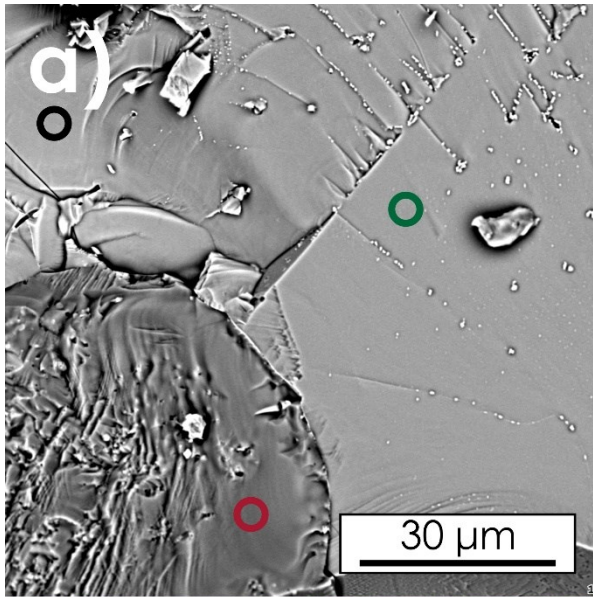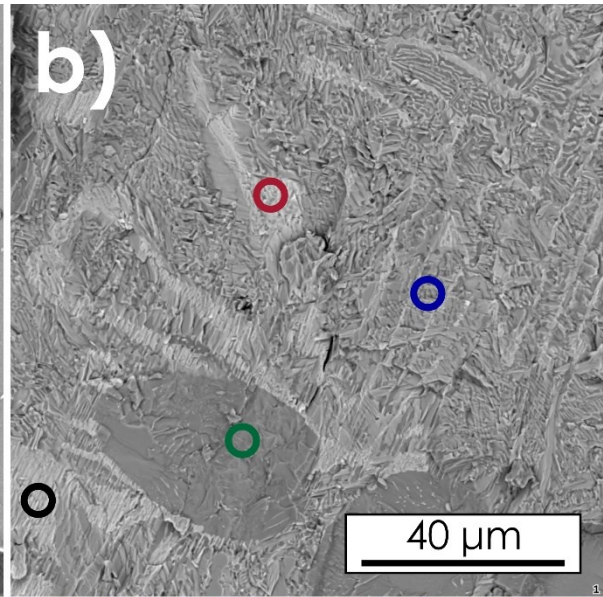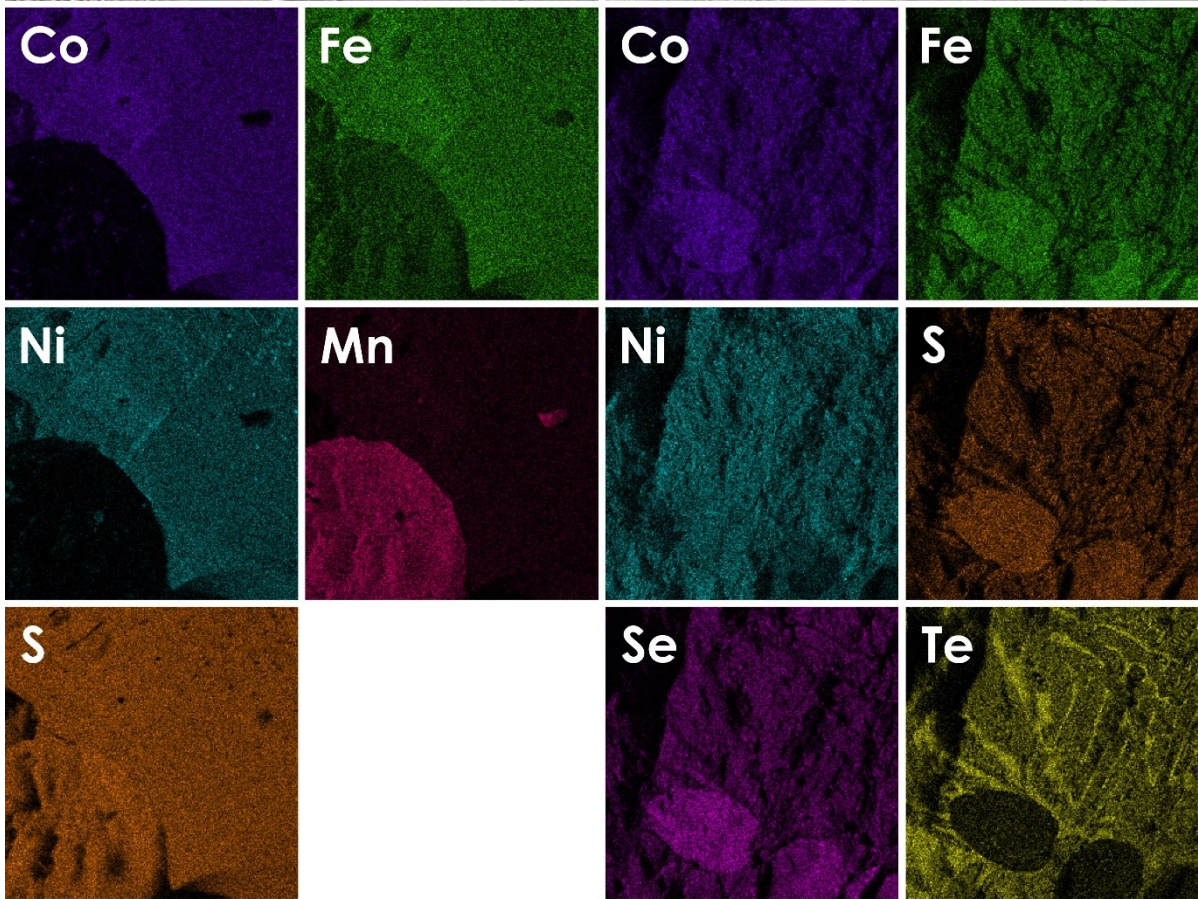

|     | Co   | Fe   | Ni   | Mn   | S    |     | Co   | Fe   | Ni   | S    | Se   | Te   |
|-----|------|------|------|------|------|-----|------|------|------|------|------|------|
| avg | 16.8 | 17.9 | 17.1 | 24.0 | 23.5 | avg | 18.0 | 16.3 | 16.4 | 12.4 | 19.4 | 17.6 |
| ○   | 1.6  | 19.1 | 0.1  | 44.7 | 34.6 | ○   | 18.7 | 3.3  | 26.8 | 1.1  | 2.5  | 47.6 |
| ○   | 21.9 | 14.9 | 18.7 | 0.1  | 44.4 | ○   | 21.9 | 15.0 | 11.1 | 21.3 | 27.9 | 2.9  |
| ○   | 21.0 | 14.9 | 18.3 | 0.5  | 45.3 | ○   | 15.3 | 7.1  | 22.5 | 4.0  | 10.4 | 40.7 |
|     |      |      |      |      |      | ○   | 16.9 | 19.2 | 23.5 | 8.3  | 12.0 | 20.1 |

**SI.Fig. 5.** SEM micrographs together with the corresponding EDS mappings and point/area analysis. All data was collected from the fractured, as-synthesized  $(\text{Co,Fe,Mn,Ni})_9\text{S}_8$  (a), and  $(\text{Co,Fe,Ni})_9(\text{S,Se,Te})_8$  ingots.

**SI. Table 1 Structural data of the  $\text{TM}_9\text{S}_8$  pentlandites,**

| Wyckoff position | $\text{TM}_9\text{S}_8$ powder  |                                 | $\text{TM}_9\text{S}_8$ pellet  |                                 |
|------------------|---------------------------------|---------------------------------|---------------------------------|---------------------------------|
|                  | Occupancy                       | B iso                           | Occupancy                       | B iso                           |
| 4a               | Co – 0.42, Fe – 0.28, Ni – 0.36 | Co – 0.50, Fe – 0.50, Ni – 0.50 | Co – 0.42, Fe – 0.26, Ni – 0.32 | Co – 0.50, Fe – 0.50, Ni – 0.50 |
| 32f              | Co – 0.42, Fe – 0.28, Ni – 0.36 | Co – 0.50, Fe – 0.5, Ni – 0.5   | Co – 0.42, Fe – 0.26, Ni – 0.32 | Co – 0.50, Fe – 0.5, Ni – 0.50  |
| 8c               | S – 1.0                         | S – 1.15                        | S – 1.0                         | S – 1.15                        |
| 24e              | S – 1.0                         | S – 0.50                        | S – 1.0                         | S – 0.50                        |

**SI. Table 2 Structural data of the  $\text{TM}_9\text{Ch}_8$  pentlandites.**

| Wyckoff position | $\text{TM}_9\text{Ch}_8$ powder |                                 | $\text{TM}_9\text{Ch}_8$ pellet |                                 |
|------------------|---------------------------------|---------------------------------|---------------------------------|---------------------------------|
|                  | Occupancy                       | B iso                           | Occupancy                       | B iso                           |
| 4a               | Co – 0.30, Fe – 0.34, Ni – 0.36 | Co – 1.21, Fe – 1.27, Ni – 1.27 | Co – 0.30, Fe – 0.34, Ni – 0.36 | Co – 1.21, Fe – 1.27, Ni – 1.27 |
| 32f              | Co – 0.30, Fe – 0.34, Ni – 0.36 | Co – 1.21, Fe – 1.27, Ni – 1.27 | Co – 0.30, Fe – 0.34, Ni – 0.36 | Co – 1.21, Fe – 1.27, Ni – 1.27 |
| 8c               | S – 0.50, Se – 0.50             | S – 0.78, Se – 0.40             | S – 0.44, Se – 0.56             | S – 0.78, Se – 0.50             |
| 24e              | S – 0.50, Se – 0.50             | S – 0.78, Se – 0.40             | S – 0.60, Se – 0.40             | S – 0.78, Se – 0.45             |
